# Supplementary material for: Stackable nickel–cobalt@polydopamine nanosheet based photothermal sponges for highly efficient solar steam generation
Source: Royal Society of Chemistry journal article supplement (doi:10.1039/d0ta03799k), 2020-01-01
Supplement: d0ta03799k1.pdf [file d0ta03799k1.pdf]

## Supporting Information

### **Stackable nickel-cobalt@polydopamine nanosheet based photothermal sponges for highly efficient solar steam generation**

Bo Shao,<sup>1</sup> Yida Wang,<sup>1</sup> Xuan Wu,<sup>1</sup> Yi Lu,<sup>2</sup> Xiaofei Yang,<sup>2</sup> George Y. Chen,<sup>3</sup> Gary Owens,<sup>1</sup> Haolan Xu<sup>1,\*</sup>

<sup>1</sup>Future Industries Institute, University of South Australia, Mawson Lakes Campus, SA 5095, Australia

<sup>2</sup> College of Science, Nanjing Forestry University, Nanjing, 210037, China

<sup>3</sup> School of Engineering, University of South Australia, Mawson Lakes Campus, SA 5095, Australia

#### **Experimental section**

**Synthesis of Ni<sub>1</sub>Co<sub>3</sub> nanosheets:** NiCl<sub>2</sub>·6H<sub>2</sub>O and CoCl<sub>2</sub>·6H<sub>2</sub>O at a molar ration of 1:3 (50 mg: 150 mg) were dissolved in 100 mL of Millipore water and the solution was kept stirring. Then 30 mL of NaBH<sub>4</sub> (0.1 M) solution was slowly added into the above solution. The reaction solution was sealed for 8 h. The black resultant precipitates were collected and washed by ethanol and water several times.

**Synthesis of Ni<sub>1</sub>Co<sub>3</sub>@PDA nanosheets:** To form a PDA layer on the surface of the Ni<sub>1</sub>Co<sub>3</sub> nanosheets, the obtained Ni<sub>1</sub>Co<sub>3</sub> nanosheets were redispersed into dopamine hydrochloride (2 mg mL<sup>-1</sup>) Tris buffer solution (pH = 8.5, 50 m M) with CuSO<sub>4</sub> (5 m M) and H<sub>2</sub>O<sub>2</sub> (19.6 × m M) for 1 h, followed by centrifugation and washing with water for several times.

**Preparation of Ni<sub>1</sub>Co<sub>3</sub>@PDA-based photothermal sponges:** 500 mg of Ni<sub>1</sub>Co<sub>3</sub>@PDA nanosheets and 50 mg of SA (5mg/mL) were dispersed into 10 mL water and was kept stirring at room temperature for 6 hours to obtain a homogeneous solution. The obtained solution was then poured onto a circular piece of sponge (3.1 cm in diameter and 0.6 cm in thickness). The resulting sample was then allowed gelation for 2 hours and pre-frozen at -22 °C for 12 hours. Afterward, the obtained Ni<sub>1</sub>Co<sub>3</sub>@PDA-sponge was freeze-dried at -60 °C to obtain the Ni<sub>1</sub>Co<sub>3</sub>@PDA-based photothermal sponge.

**Characterization:** Field emission scanning electron microscopy (SEM) images were recorded using a Zeiss Merlin SEM. UV-Vis spectrum were recorded on a UV-2600 Spectrophotometer (Shimadzu). Infrared photographs were taken using an IR camera (FLIRE64501). Seawater

was collected from Semaphore Beach, Adelaide, Australia. The salinity of the seawater was measured using an Inductively Coupled Plasma Optical Emission Spectrometry (ICP-OES, Optima 5300V, Perkin Elmer). After solar evaporation, the ion concentrations of the collected water were measured using an ICP Triple Quad system (ICP-QQQ, Agilent 8800).

**Water Evaporation Tests:** Milli-Q water or seawater was held in a 200 mL plastic bottle. A polystyrene (PS) foam collar with a hole (3.1 cm in diameter) was employed as a cap for the bottle and to hold the cotton rod which served as a 1D water path. The Ni<sub>1</sub>Co<sub>3</sub>@PDA-based photothermal sponges were then placed on the top of the cotton rod. The other end of the cotton rod was immersed in the bulk water so that the water could continuously be transferred to the Ni<sub>1</sub>Co<sub>3</sub>@PDA-based photothermal sponges by capillary action. Simulated sunlight was provided by a Newport Oriel Solar Simulator (Newport Oriel Xenon Lamp, 66485-300XF-R1). The plastic bottle was placed on an electronic balance that was connected to a computer to monitor the water mass loss in real time.

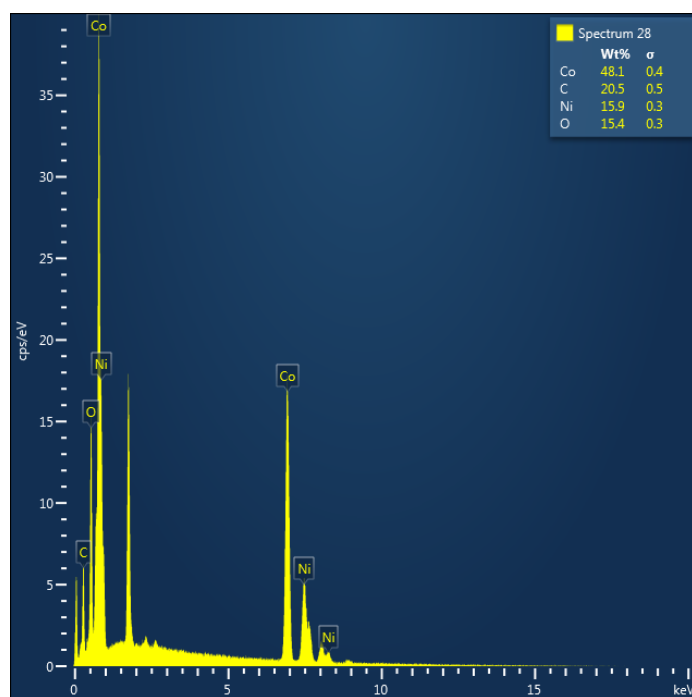

**Fig. S1** EDX spectrum of the Ni<sub>1</sub>Co<sub>3</sub> bimetal. The weight ratio of Ni:Co is 48.1:15.9, corresponding to an atomic ratio of 1:3.01.

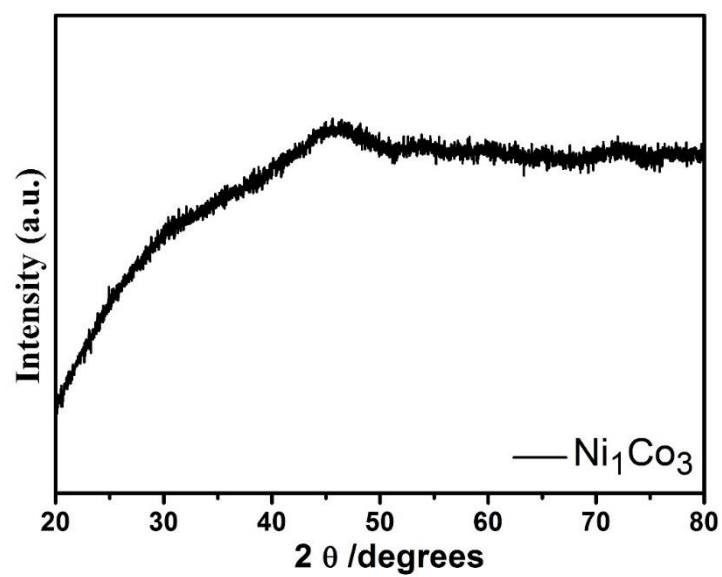

**Fig. S2** XRD pattern of Ni<sub>1</sub>Co<sub>3</sub> nanosheets. The broad weak peak over a wide  $2\theta$  range (42 - 48°) with no other clear peaks indicated that the obtained Ni<sub>1</sub>Co<sub>3</sub> was amorphous.

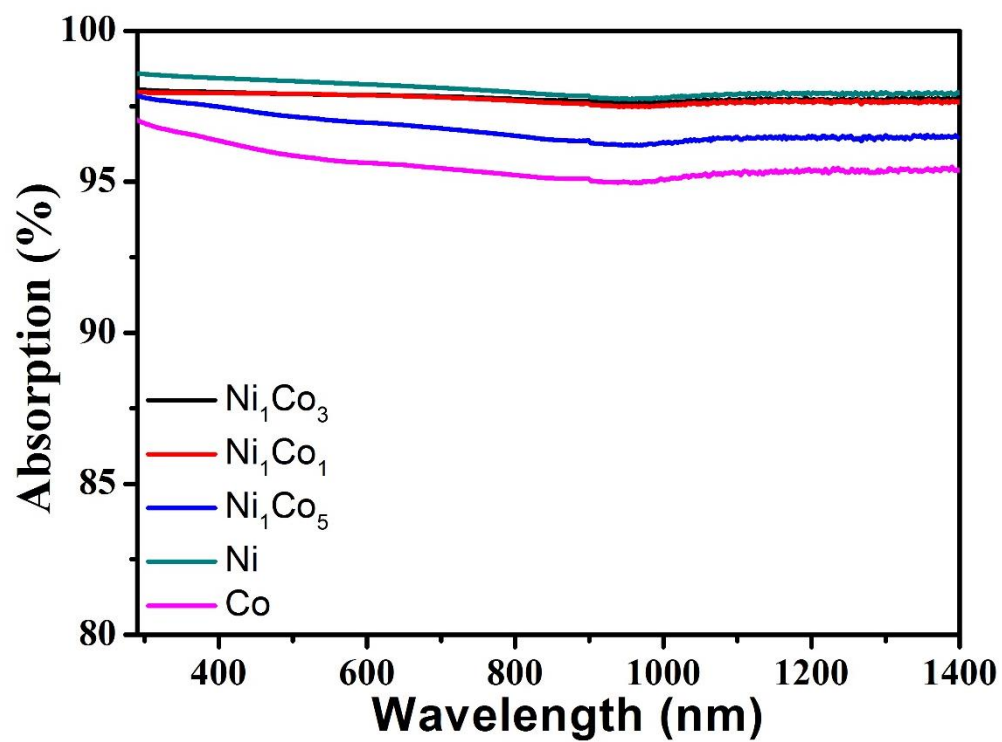

**Fig. S3** UV-Vis spectra of Ni-Co bimetallics without PDA coating.

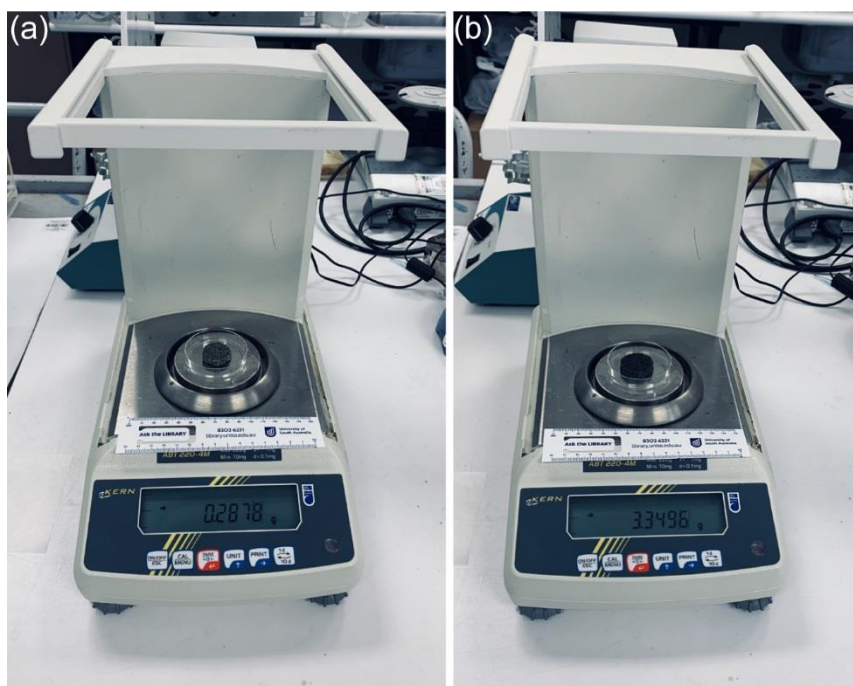

**Fig. S4** Digital photographs illustrating weight change in photothermal sponge (a) before and (b) after water uptake.

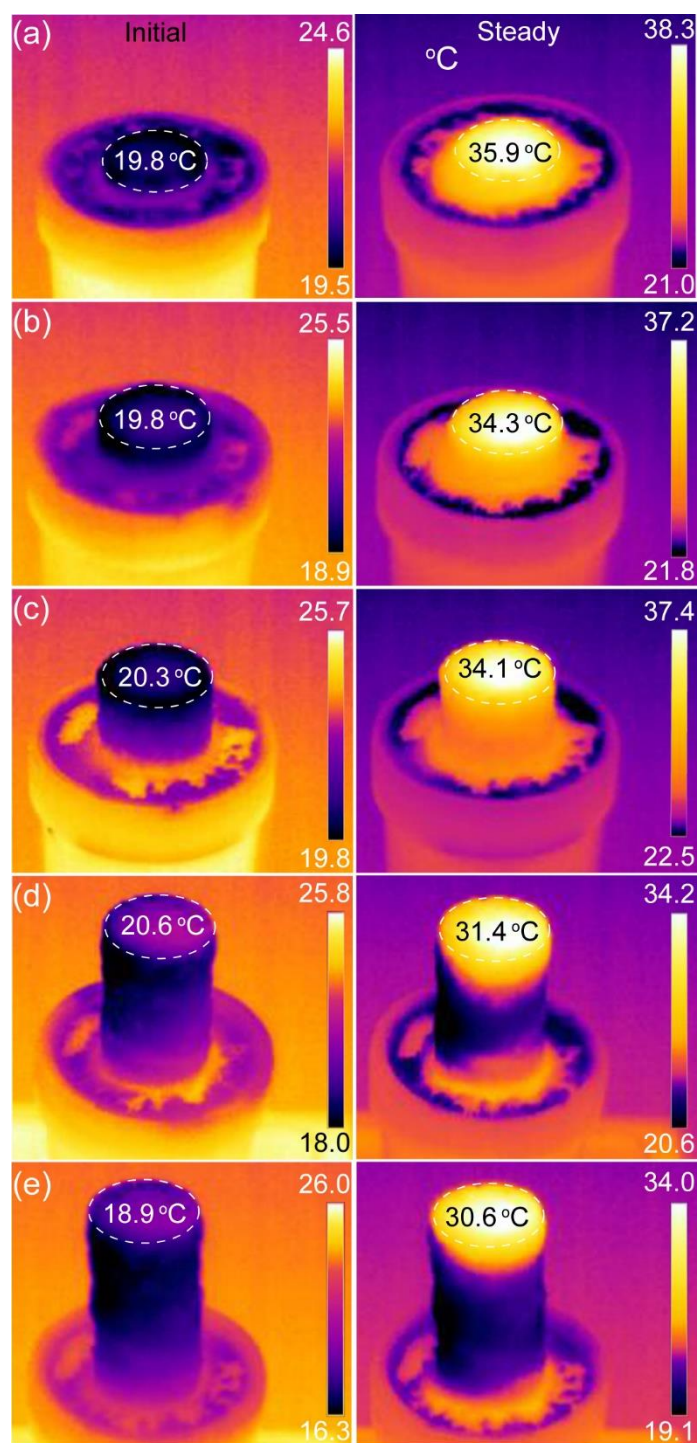

**Fig. S5** IR images showing the initial and steady average top surface temperatures of the photothermal sponges with heights of (a) 0.6 cm, (b) 1.2 cm, (c) 2.4 cm, (d) 4.8 cm and (e) 6.0 cm.

Table S1 The comparison of photothermal evaporation performance for Ni<sub>1</sub>Co<sub>3</sub>@PDA sponge and the reported photothermal materials and evaporators

| Photothermal materials/evaporator                                  | Structure | Light intensity (kW/m <sup>2</sup> ) | Evaporation rate (kg/m <sup>2</sup> h) | Publication                                 |
|--------------------------------------------------------------------|-----------|--------------------------------------|----------------------------------------|---------------------------------------------|
| Ni <sub>1</sub> Co <sub>3</sub> @PDA sponge                        | 3D        | 1.0                                  | 2.42                                   | This work                                   |
| Ni-NiO <sub>x</sub> /Ni foam                                       | 2D        | 1.0                                  | 1.41                                   | J. Mater. Chem. A, 2019, 7, 8485            |
| Al nanoparticles/AAM                                               | 2D        | 1.0                                  | 0.92                                   | Nat. Photonics 2016, 10, 393                |
| Semiconductor particles-based cup shaped structure                 | 3D        | 1.0                                  | 2.04                                   | Joule 2018, 2, 1171                         |
| Carbonized mushrooms                                               | 3D        | 1.0                                  | 1.48                                   | Adv. Mater. 2017, 29, 1606762               |
| Carbonized sunflower heads                                         | 3D        | 1.0                                  | 1.51                                   | ACS Appl. Mater. Interfaces 2020, 12, 2171  |
| CuS based aerogel                                                  | 3D        | 1.0                                  | 1.63                                   | Nano Energy, 2019, 56, 708                  |
| Carbon black-based cylinder structure                              | 3D        | 1.0                                  | 1.62                                   | Joule 2018, 2, 1331                         |
| Nanoink-stained sponge                                             | 3D        | 1.0                                  | 2.15                                   | Nano Energy, 2019, 55, 368                  |
| Graphene oxide-based umbrella structure                            | 3D        | 1.0                                  | 1.80                                   | Natl. Sci. Rev. 2018, 5, 70                 |
| Carbon felt-based Hierarchical Structure                           | 3D        | 1.0                                  | 1.56                                   | ACS Appl. Mater. Interfaces 2019, 11, 32038 |
| Carbonized carrot                                                  | 3D        | 1.0                                  | 2.04                                   | J. Mater. Chem. A, 2019, 7, 26911           |
| Graphite paper-based origami structure                             | 3D        | 1.0                                  | 1.16                                   | Chem. Eng. J. 2019, 356, 869                |
| CuFeMnO <sub>4</sub> coated honeycomb ceramic                      | 3D        | 1.0                                  | 1.45                                   | Nano Energy 2019, 60, 222                   |
| Carbon nanotube-based 3D printed cone structure                    | 3D        | 1.0                                  | 2.63                                   | Nature Communication 2020, 11, 521          |
| Reduced graphene oxide and rice straw fiber-based cylinder aerogel | 3D        | 1.0                                  | 2.25                                   | ACS Appl. Mater. Interfaces 2020, 12, 15279 |



### Energy calculation:

To explain the extremely high energy efficiency, energy exchange between the photothermal sponges and the environment was analysed using the following equation:

$$E_{\text{environment}} = A_1 \varepsilon \sigma (T_1^4 - T_0^4) + A_2 \varepsilon \sigma (T_2^4 - T_0^4) + A_1 h (T_1 - T_0) + A_2 h (T_2 - T_0) + q_{\text{water}} - q_{\text{other}}$$

For the 0.6 cm sample,  $A_1$  is the area of the top surface of the photothermal sponge (7.55 cm<sup>2</sup>),  $T_1$  is the average surface temperature of the top surface (~35.9 °C),  $A_2$  is the side surface area (5.843 cm<sup>2</sup>), and  $T_2$  is the average surface temperature of the side wall (~ 32.3 °C),  $T_0$  is the ambient temperature (25 °C),  $\varepsilon$  is emissivity of the absorbing surface (~0.90),  $\sigma$  is the Stefan–Boltzmann constant ( $5.67 \times 10^{-8} \text{ W m}^{-2} \text{ K}^{-4}$ ),  $h$  is the convection heat transfer coefficient (assumed to be  $5 \text{ W m}^{-2} \text{ K}^{-1}$ ), and  $q_{\text{water}}$  is the energy exchange between the stored water and the photothermal sponge, which is 0 W in this work.

According to the above equation, for the 0.6 cm photothermal sponge, the radiation loss from the top evaporation surface was estimated to be 0.0470 W, while radiation energy loss of the side evaporation surface was 0.0239 W. Convection loss from the top evaporation surface was estimated to be 0.0411 W, and convection energy loss of the side evaporation surface was estimated to be 0.0210 W. The total energy loss was 0.133 W.

For the 6.0 cm sample,  $A_1$  is 7.55 cm<sup>2</sup>,  $T_1$  is 31.1 °C,  $A_2$  is 58.43 cm<sup>2</sup>, and  $T_2$  is 23.6 °C,  $T_0$  is the ambient temperature (25 °C),  $\varepsilon$  is emissivity of the absorbing surface (~0.90),  $\sigma$  is the Stefan–Boltzmann constant ( $5.67 \times 10^{-8} \text{ W m}^{-2} \text{ K}^{-4}$ ),  $h$  is convection heat transfer coefficient (assumed to be  $5 \text{ W m}^{-2} \text{ K}^{-1}$ ), and  $q_{\text{water}}$  is is the energy exchange between the stored water and the photothermal sponge, which is 0 W in this work. Since the side evaporation surface has a lower temperature than the environment temperature ( $T_2 < T_0$ ), it could gain energy from the environment.

According to the above equation, for the 6.0 cm photothermal sponge, the radiation loss from the top evaporation surface was estimated to be 0.0256 W, while radiation energy gain of the side evaporation surface from surrounding environment was 0.0438 W. Convection loss from the top evaporation surface was estimated to be 0.0237 W, and convection energy gain of the side evaporation surface from surrounding environment was estimated to be 0.0354 W. Therefore, the evaporator has a net energy gain of 0.0792 W from the environment.
